# Supplementary material
Source: publisher site journal article supplement (https://www.dovepress.com/article/433506)
Supplement: Supplementary file 1 [file get_supplementary_file.php]

**The questionnaire of the study**

Please read this information sheet carefully.

The following questionnaire has been designed to assess the impact of cousin marriage on Palestinian health. We are currently offering you the opportunity to participate in a research study aiming at enhancing knowledge about changes in the health situation of Palestinians as a result of cousin marriage. Your consent to participate in this study will not entail any additional treatment, and you will not undergo any procedures or treatments other than those prescribed by your doctor. As a result, participating in this study will provide no direct benefit to you. Involvement in this study (if accepted) will entail collecting data about your health status. You will be only asked to complete the following questionnaire. Please note that your participation is entirely voluntary, and you have complete freedom to decline participation in this study with no need to provide any further explanation. Your name and initials will not appear in any study-related documents.

The findings of this study will be presented in journals or at conferences for dissemination, and under no circumstances your identity will be disclosed in these publications

**Do you consent to participate in the study?**

Agree

Disagree

**Social and Demographic Data**

Gender

Male

Female

**Age (in years)**

**Height (in cm)**

**Weight (in kg)**

**Place of residence**

Village

City

Camp

**Region or Governorate?**

Jenin

Tubas

Tulkarm

Qalqilya

Nablus

Ramallah and Al-Bireh

Jericho and the Jordan Valley

Bethlehem

Hebron

Jerusalem

Inside Palestine (1948)

Gaza Strip

**Educational level?**

Below elementary education level.

School level (elementary/middle/high school)

University education (Associate/Bachelor's degree)

Postgraduate studies (Postgraduate diploma/Master's/Ph.D., specify)

**Father's educational level?**

Below elementary education

School level (elementary/middle/high school)

University education (Associate/Bachelor's degree)

Postgraduate studies (Postgraduate diploma/Master's/Ph.D., specify)

**Mother's educational level?**

Below elementary education

School level (elementary/middle/high school)

University education (Associate/Bachelor's degree)

Postgraduate studies (Postgraduate diploma/Master's/Ph.D., specify)

**Current occupation?**

Public sector employee

Private sector employee

Non-profit organization employee (e.g., NGOs or charitable institutions)

Self-employed

Student

Retired

Housewife

Unemployed

**Is your study or work related to the medical field?**

Yes

No

**Monthly family income?**

Less than 2000 shekels

2000-5000 shekels

5000-10000 shekels

More than 10000 shekels

**Religion**

Islam

Christianity

Samaritan

Other

**Is there a blood relationship between your father and mother?**

Yes

No

**Please specify the degree of relationship between your father and mother.**

**Does any of your relatives suffer from any genetic diseases?**

Yes

No

**Please specify the degree of relationship for any relatives with genetic diseases.**

**If any of your relatives have genetic diseases, please mention these diseases.**

**Do you support cousin marriage?**

Yes

No

Neutral

**What is the reason for your support or opposition regarding cousin marriage?**

Traditions and customs

Religious reasons

Economic reasons

Medical and scientific reasons

Personal reasons

**Have you received any awareness or information about the risks of cousin marriage?**

Yes

No

**If you have received awareness about the risks of cousin marriage, what is the source of this information?**

**Marital status**

Single

Married

Separated

Divorced

Widowed

**Is there a blood relationship between you and your wife/husband?**

Yes

No

**If there is a blood relationship between spouses, please specify the degree of relationship between you and your wife/husband.**

**Age at marriage?**

**Did you face any difficulties in conceiving?**

Yes

No

**Do you have children?**

Yes

No

**If you have children**

**Number of male children?**

**Number of female children?**

**Does any of the children suffer from any diseases?**

Yes

No

**Has there been a miscarriage in your family?**

Yes

No

**Have you been diagnosed with any chronic illnesses?**

Yes

No

**If you suffer from any chronic diseases**

**If you have any chronic diseases, please specify them**
